# Supplementary material for: Synthesis and characterization of a Cu(ii) Schiff base complex immobilized on graphene oxide and its catalytic application in the green synthesis of propargylamines
Source: Royal Society of Chemistry journal article supplement (doi:10.1039/c5ra25209a), 2016-01-01
Supplement: c5ra25209a1.pdf [file c5ra25209a1.pdf]

## Supporting Information

# **Synthesis and characterization of Cu(II) Schiff base complex immobilized on graphene oxide and its catalytic application in the green synthesis of propargylamines†**

Shweta Kumari,<sup>a</sup> Amiya Shekhar<sup>b</sup> and Devendra D. Pathak<sup>a,\*</sup>

<sup>a</sup> Department of Applied Chemistry, Indian School of Mines, Dhanbad-826004, India

<sup>b</sup> Department of Chemistry, Vidya Vihar Institute of Technology, Purnea-854303, India

\*Email: [ddpathak61@gmail.com](mailto:ddpathak61@gmail.com) (DD Pathak)

Phone number: +91 9431126250

| <b>Content</b>                                                                   | <b>Page No.</b> |
|----------------------------------------------------------------------------------|-----------------|
| 1. Synthesis of Ligand (L)                                                       | 3               |
| 2. Synthesis of Cu(II) Schiff base complex immobilized on graphene oxide (GO-Cu) | 3               |
| 3. Synthesis of propargylamines                                                  | 3-4             |
| 4. UV-visible spectrum of GO                                                     | 4               |
| 5. UV-visible spectra of GO- APTMS, L, GO-APTMS-L and GO-Cu                      | 4               |
| 6. FESEM image of GO, GO- APTMS, GO-APTMS-L and GO-Cu                            | 5               |
| 7. EDAX analysis of GO, GO-APTMS GO-APTMS-L and GO-Cu                            | 5               |
| 8. The TGA thermograms of GO and GO-Cu                                           | 6               |
| 9. Recyclability of Catalyst                                                     | 6               |
| 10. Spectral data of synthesized Ligand and propargylamines                      | 7-29            |
| 11. References                                                                   | 29              |

### **Synthesis of Ligand (L):**

The ligand (L) was synthesized by literature procedure.<sup>1</sup> initially 2-ethoxyaniline (1 mmol) was mixed with 2 mL NaNO<sub>2</sub> solution (1.2 mmol), then HCl (37%) was added until the pH reached 2. The mixture was stirred for 30 min. Salicylaldehyde (1 mmol) was dissolved in 5 mL of pH:12 buffer solution containing NaOH and Na<sub>2</sub>CO<sub>3</sub> (1:2). The diazonium solution was added very slowly to the salicylaldehyde solution. While adding, the temperature was kept at 0–2°C and the pH was kept at around 7–8. The dark orange product was filtered and dried under vacuum at 60°C for 12 h.

### **Synthesis of Cu(II) Schiff base complex immobilized on graphene oxide (GO-Cu):**

For the preparation of Cu(II) Schiff base complex immobilized on graphene oxide sheets, initially, we synthesized graphite oxide (GO) for a support material by using the modified Hummers method.<sup>2</sup> In first step, GO (1000 mg) was dispersed in 100 ml toluene by sonication for an hour and then it refluxed with 2.0 ml of APTMS under a nitrogen atmosphere for 24 hours. Black products of APTMS coated GO was filtered, washed with ethanol, and dried under vacuum at 50°C. In the next step, 100 mg of GO-APTMS dispersed in 100 ml of ethanol and was refluxed with 500 mg L under a nitrogen atmosphere for 6 h. In the final step, 100 mg of GO-APTMS-L was dispersed in 100 ml of ethanol and then mixed with 100 mg ethanolic solution of Cu(OAc)<sub>2</sub>.H<sub>2</sub>O for 4 h. Then, the final product was washed with ethanol repetitively to remove the undigested content of Cu(OAc)<sub>2</sub>.H<sub>2</sub>O, dried in an vacuum oven at 50°C for 12 h.

### **General procedure for synthesis of propargylamines:**

The GO-Cu (20 mg) was added to a stirred solution of aldehydes (1 mmol), amines (1 mmol) and alkynes (1.2 mmol) in water (5 mL) under N<sub>2</sub> atmosphere. The reaction mixture was heated under reflux for specific time (8-12 h). After completion, the reaction mixture was cooled to room temperature and the GO-Cu catalyst removed by filtration. The filtrate was

treated with ethyl acetate (3x10 mL). The combined organic layers were treated with saturated brine solution and dried over anhydrous sodium sulphate. The removal of solvent yielded crude product, which after purification by column chromatography over silica gel (100-200 mesh), afforded the desired products.

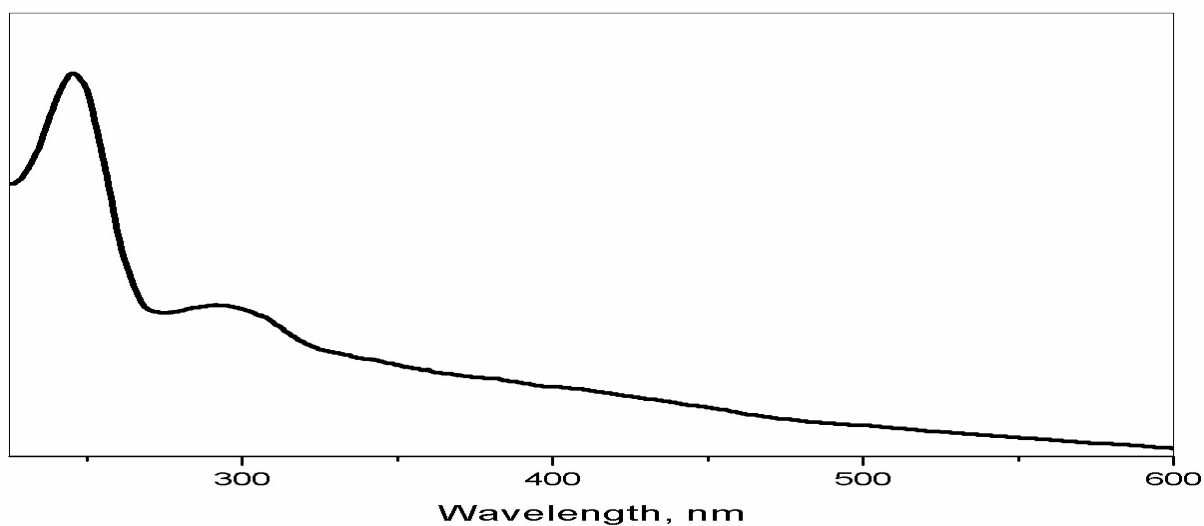

**Figure S1.** UV-visible spectrum of GO.

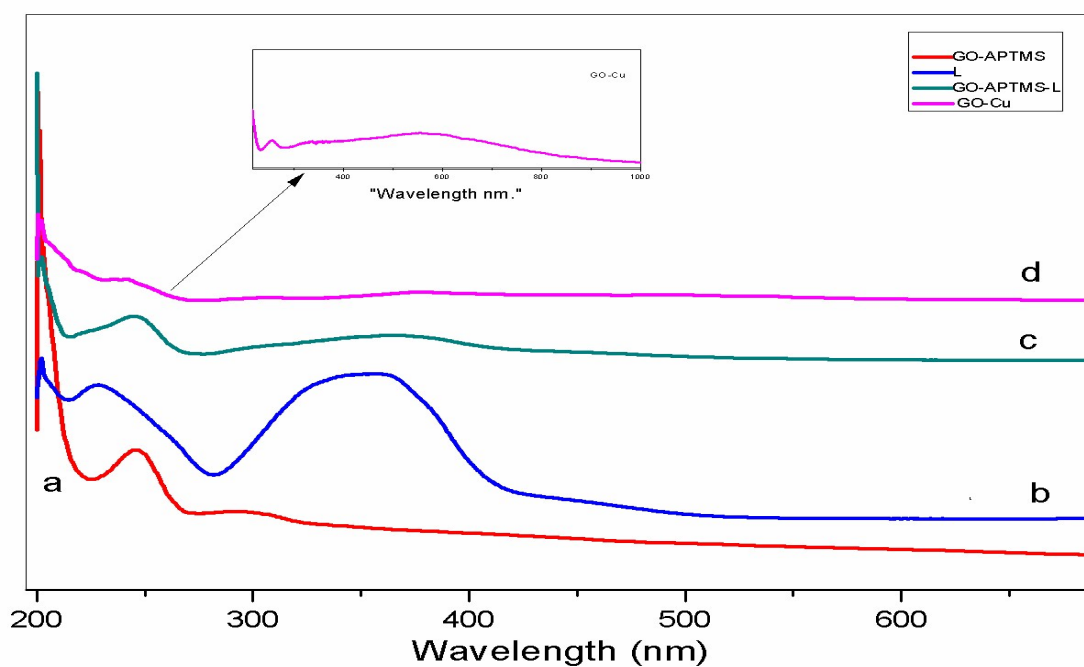

**Figure S2.** UV-visible spectra of GO- APTMS, L, GO-APTMS-L and GO-Cu.

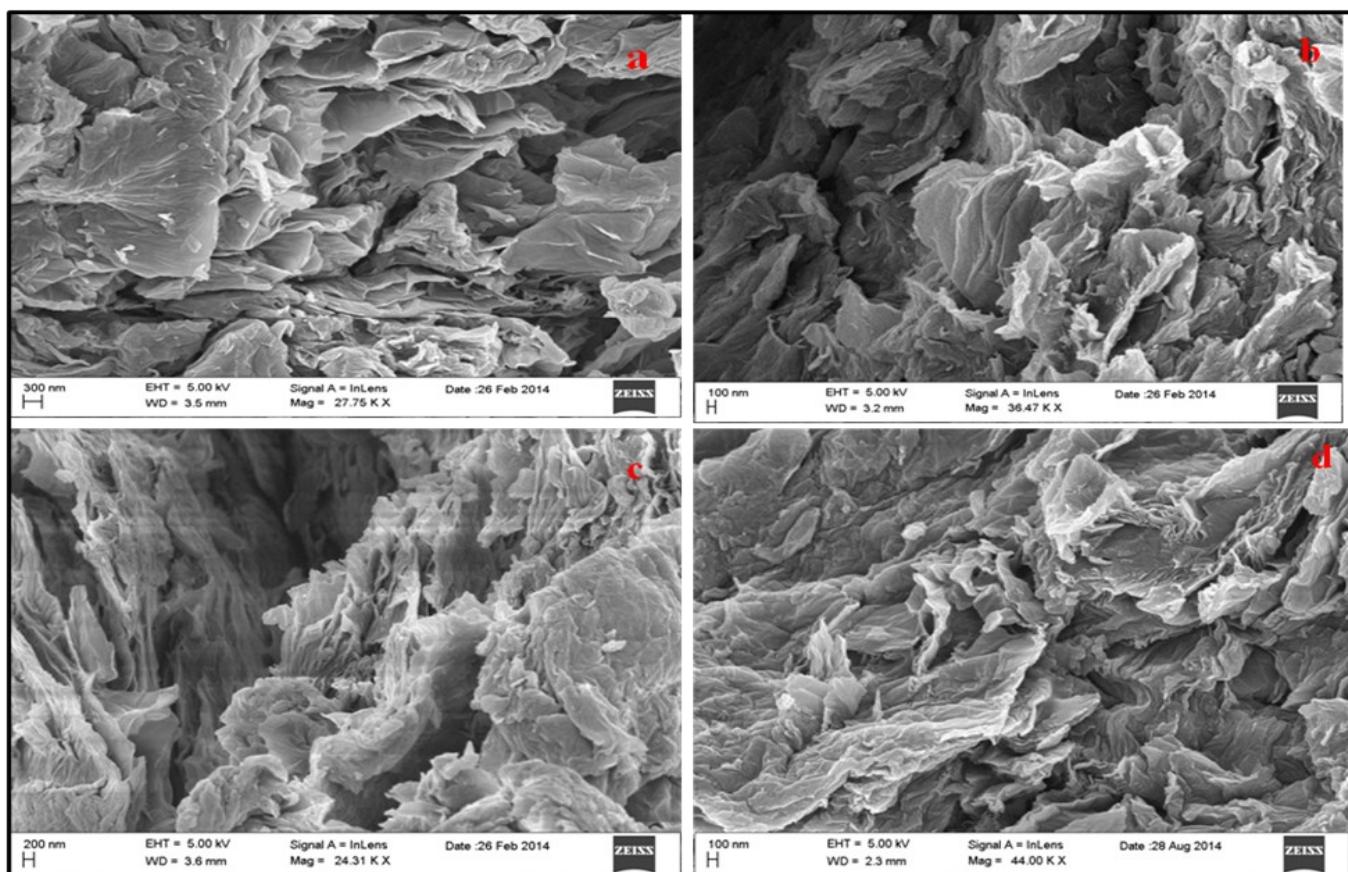

**Figure S3.** FEEM image of (a) GO (b) GO-APTMS (c) GO-APTMS-L and (d) GO-Cu.

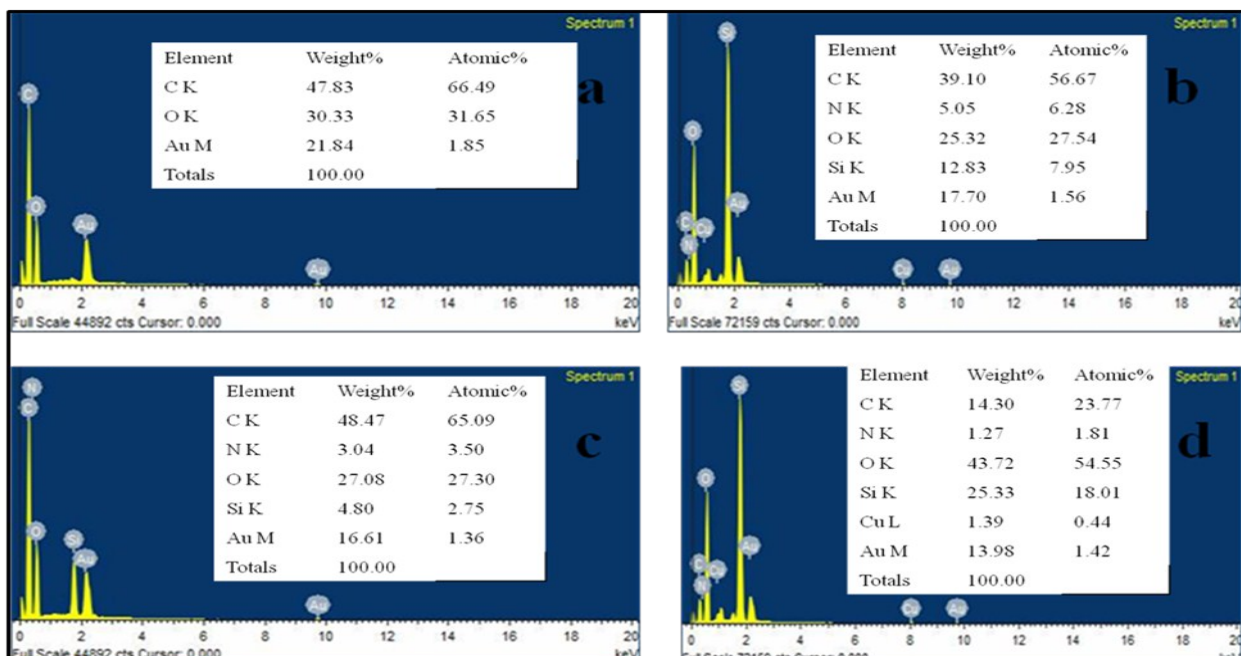

**Figure S4.** EDAX of (a) GO, (b) GO-APTMS, (c) GO-APTMS-L and (d) GO-Cu.

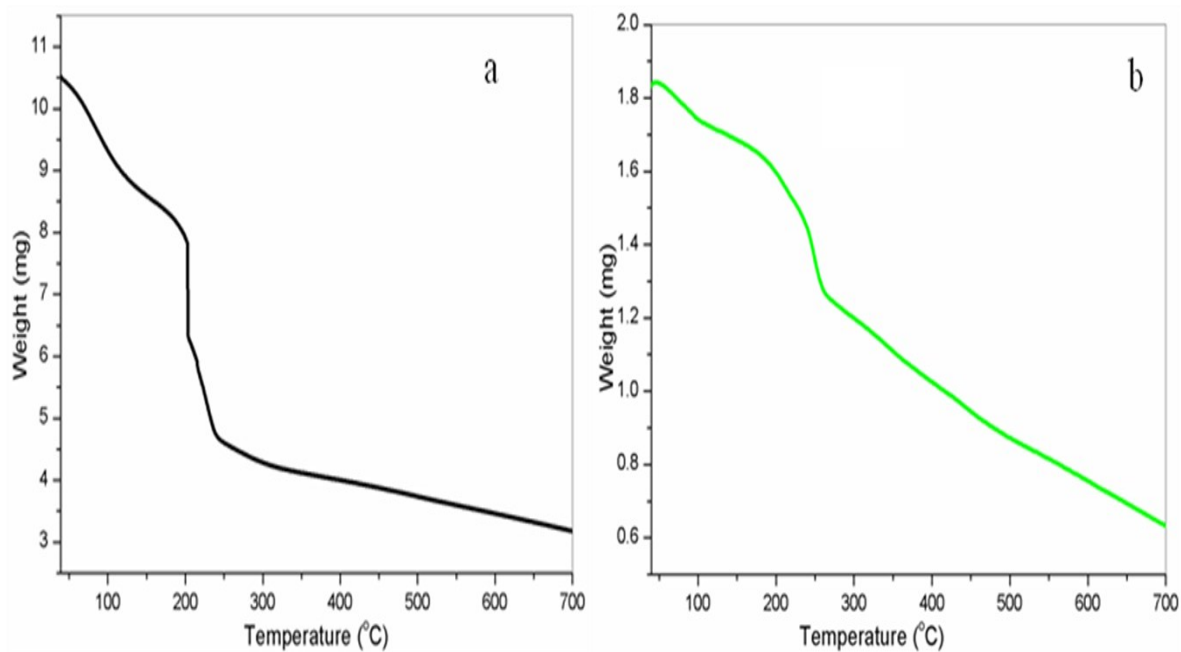

**Figure S5.** TGA thermograms of (a) GO and (b) GO-Cu.

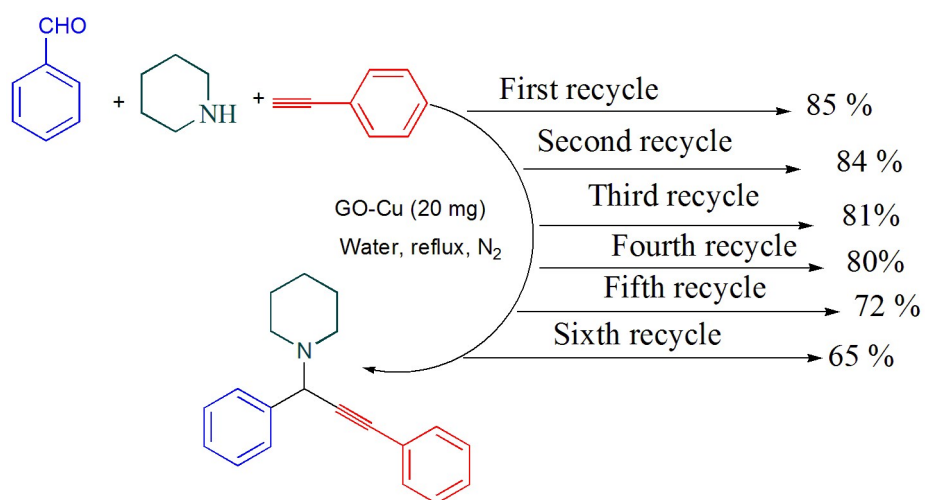

**Figure S6.** Recyclability of the catalyst.

## Spectral data of synthesized Ligand and propargylamines:

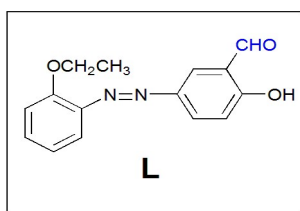

5-((2-ethoxyphenyl)diazenyl)-2-hydroxybenzaldehyde, Orange solid; FT-IR (m,  $\text{cm}^{-1}$ ): 3538, 2969, 2942, 1650, 1485;  $^1\text{H NMR}$  (400 MHz,  $\text{CDCl}_3$ , ppm)  $\delta$  11.31 (s, 1 H, -OH),  $\delta$  10.02 (s, 1 H, -CHO),  $\delta$  8.19-8.16 (d, 2H),  $\delta$  7.68-7.40 (d, 2H),  $\delta$  7.26-7.01 (t, 2H),  $\delta$  6.99 (s, 1H),  $\delta$  4.28-4.11 (m, 2H),  $\delta$  1.69-1.24 (m, 3H).

J501-K00067-000-LIIISHW

$\text{CDCl}_3$

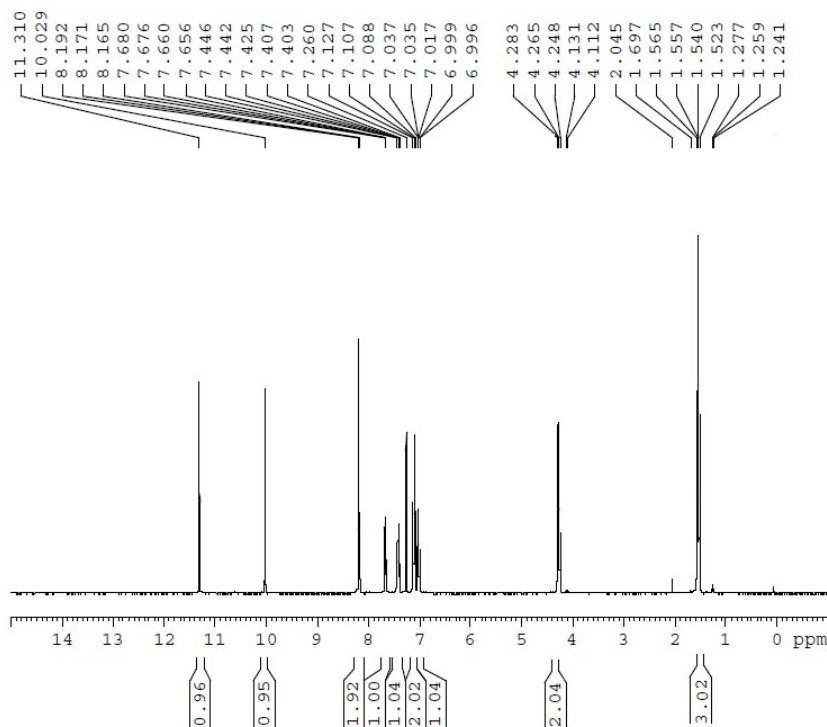

```

Current Data Parameters
NAME      J501-K00067-000-LIIISHW
EXPNO    1
PROCNO   1

F2 - Acquisition Parameters
Date_    20141104
Time     16.06
INSTRUM  spect
PROBHD   5 mm DUL 13C-1
PULPROG  zgpg
TD        32768
SOLVENT  CDCl3
NS        8
DS        0
SWH       8223.685 Hz
FIDRES    0.250967 Hz
AQ        1.9923444 sec
RG         128
RW         60.800 usec
DE         6.50 usec
TE        300.0 K
D1        1.0000000 sec
TDO       1

----- CHANNEL f1 -----
NUC1      1H
P1        11.00 usec
PL1       -2.80 dB
PL12      20.5810283 W
SFO1      400.2624718 MHz

F2 - Processing parameters
SI         65536
SF         400.2600110 MHz
WDW        EM
SSB        0
LB         0.30 Hz
GB         0
PC         1.00
    
```

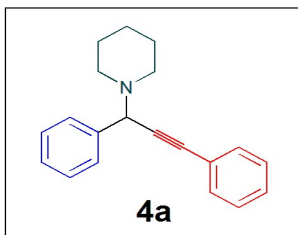

*1-(1,3-diphenylprop-2-ynyl)piperidine*, FT-IR (m,  $\text{cm}^{-1}$ ): 3045, 2981, 1611, 1520, 1432, 1320, 1162;  $^1\text{H}$  NMR (500 MHz,  $\text{CDCl}_3$ , ppm)  $\delta$  7.70-7.69 (m, -Ar 2H),  $\delta$  7.59-7.57 (m, -Ar 2H),  $\delta$  7.43-7.33 (m, -Ar 6H),  $\delta$  4.86 (s, -CH, 1H),  $\delta$  2.64-2.62 (t, 4H),  $\delta$  1.70-1.61 (m, 4H),  $\delta$  1.51-1.148 (m, 2H).

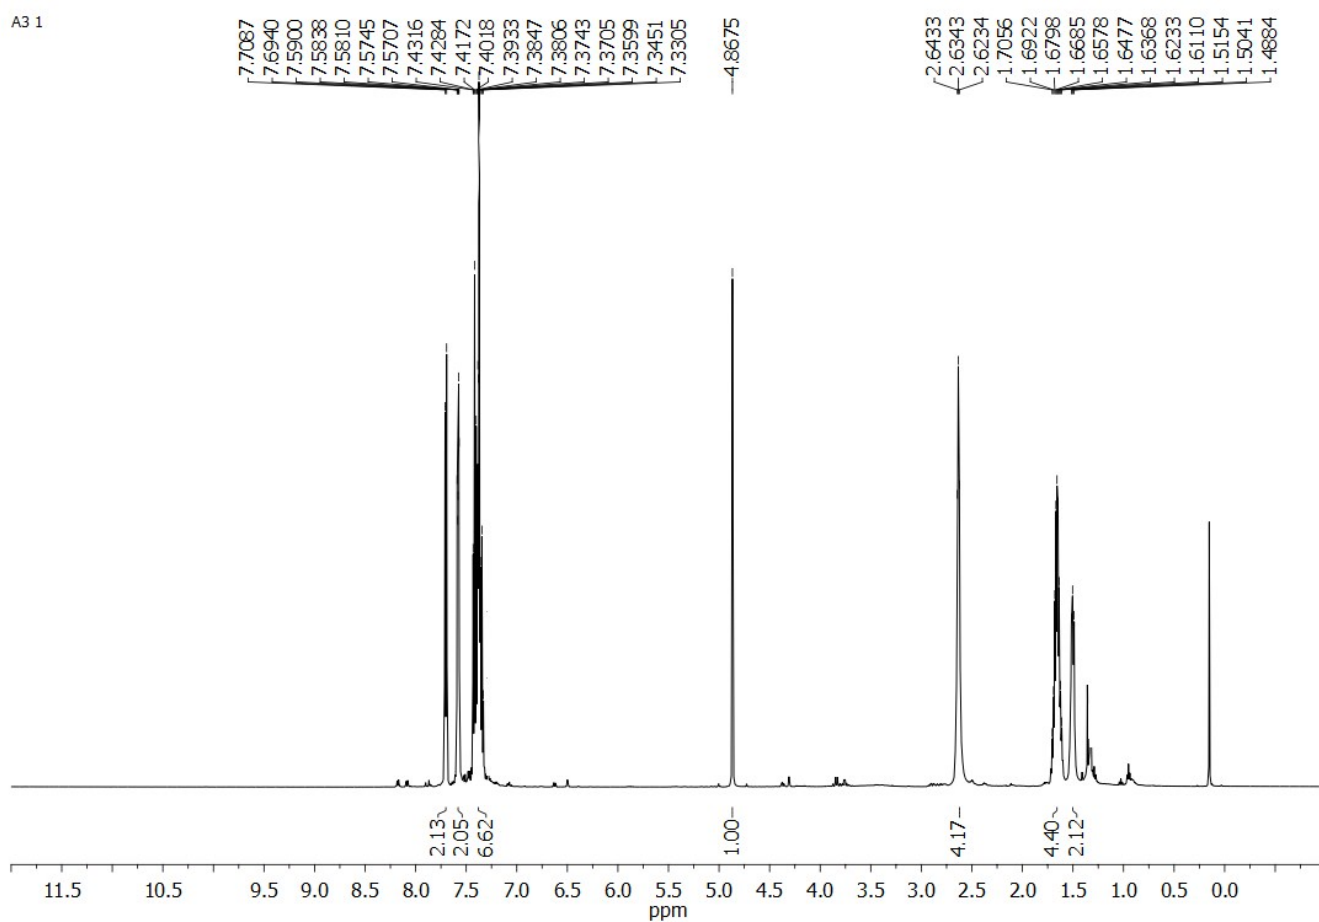



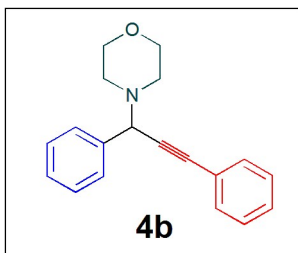

4-(1,3-diphenylprop-2-ynyl)morpholine, Pale yellow oily liquid;  $^1\text{H NMR}$  (400 MHz,  $\text{CDCl}_3$ , ppm)  $\delta$  7.70-7.69 (m, 2H),  $\delta$  7.59-7.57 (m, 2H),  $\delta$  7.43-7.33 (m, 6H),  $\delta$  4.86 (s, 1H),  $\delta$  3.72-3.75 (t, 4H),  $\delta$  2.62-2.65 (t, 4H).

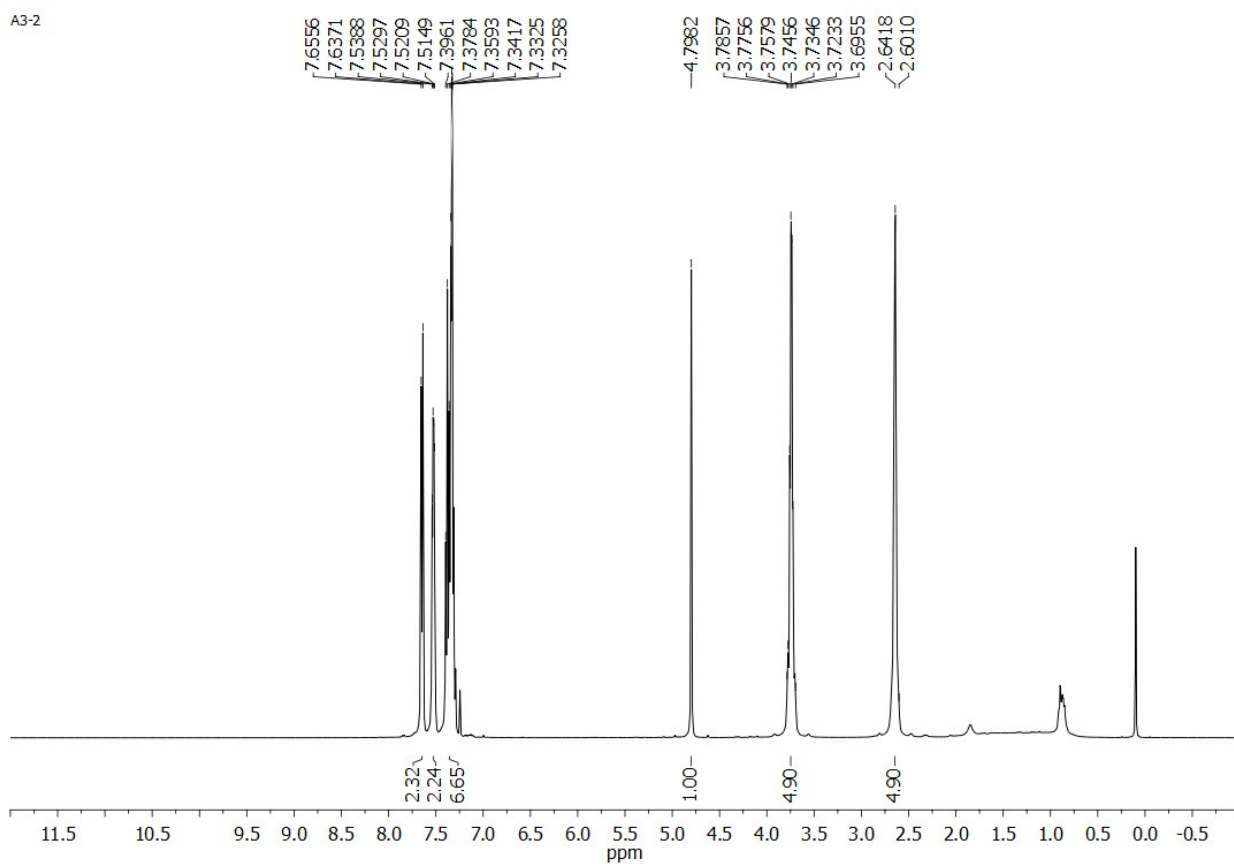

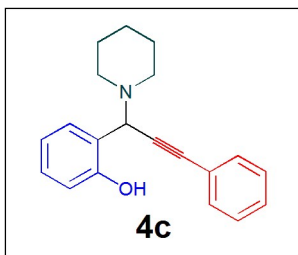

2-(3-phenyl-1-(piperidin-1-yl)prop-2-ynyl)phenol.

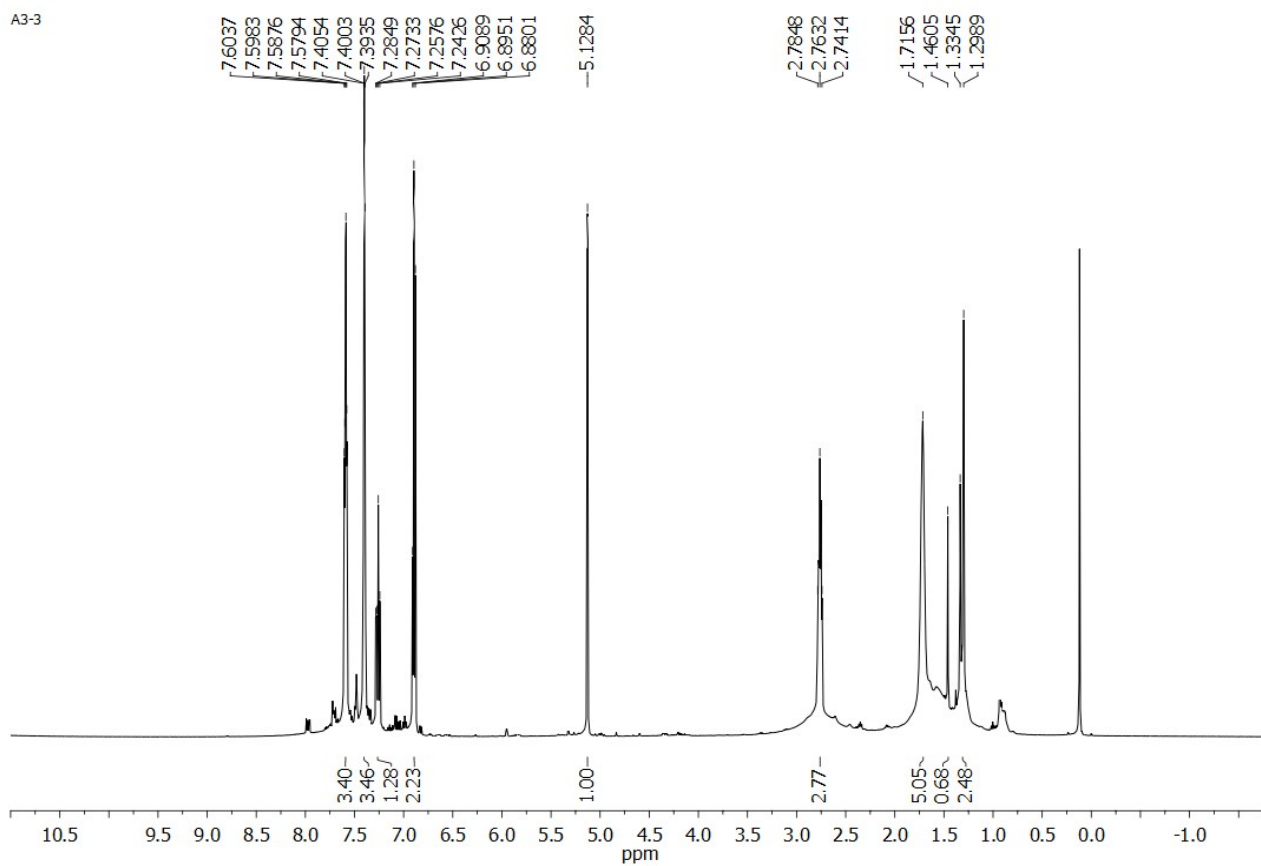

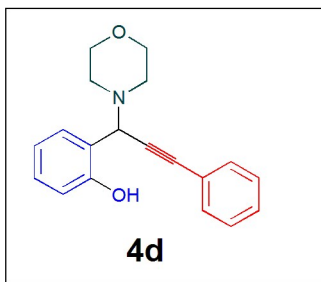

*2-(1-morpholino-3-phenylprop-2-ynyl)phenol.*

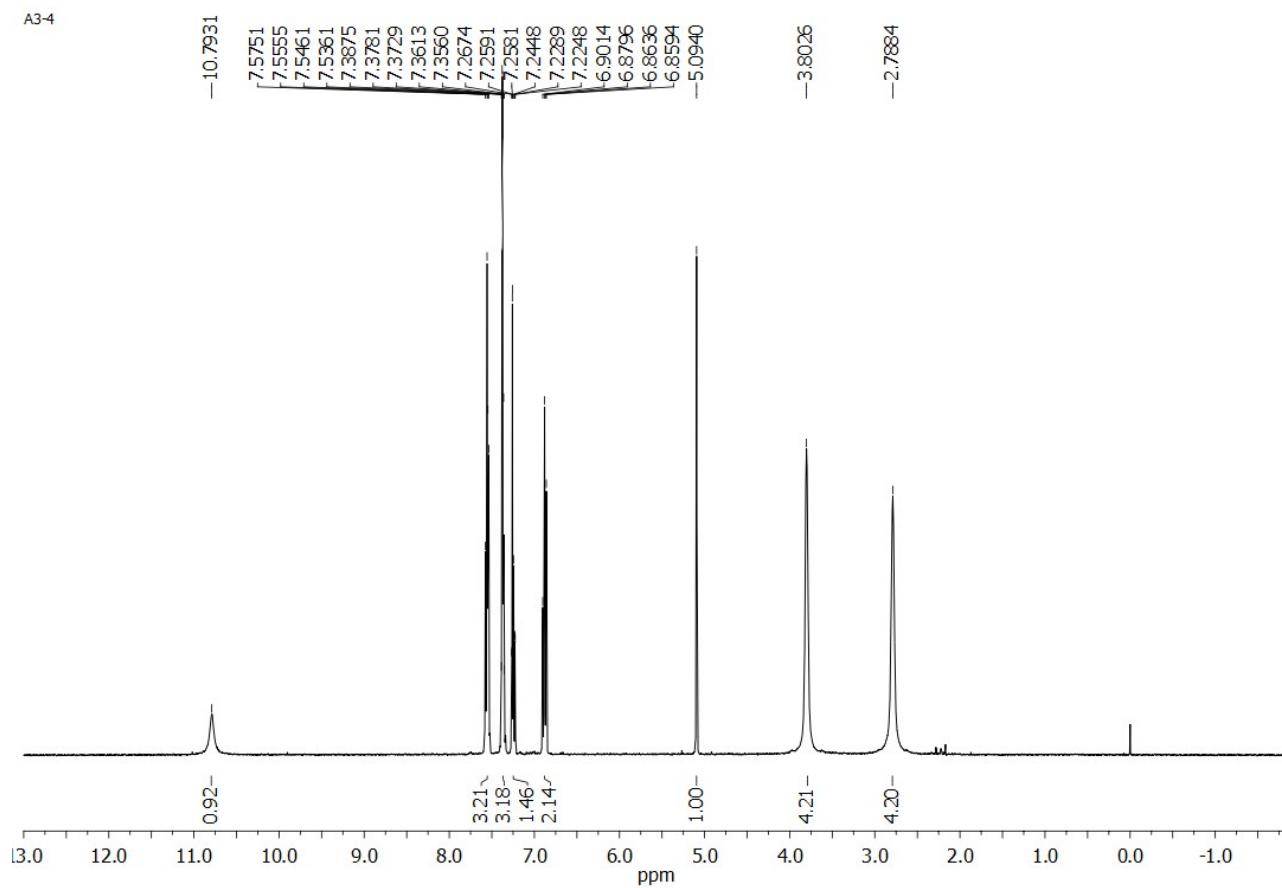

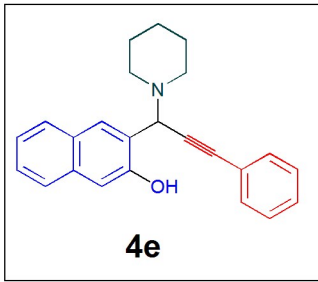

3-(3-phenyl-1-(piperidin-1-yl)prop-2-ynyl)naphthalen-2-ol.

A3-5

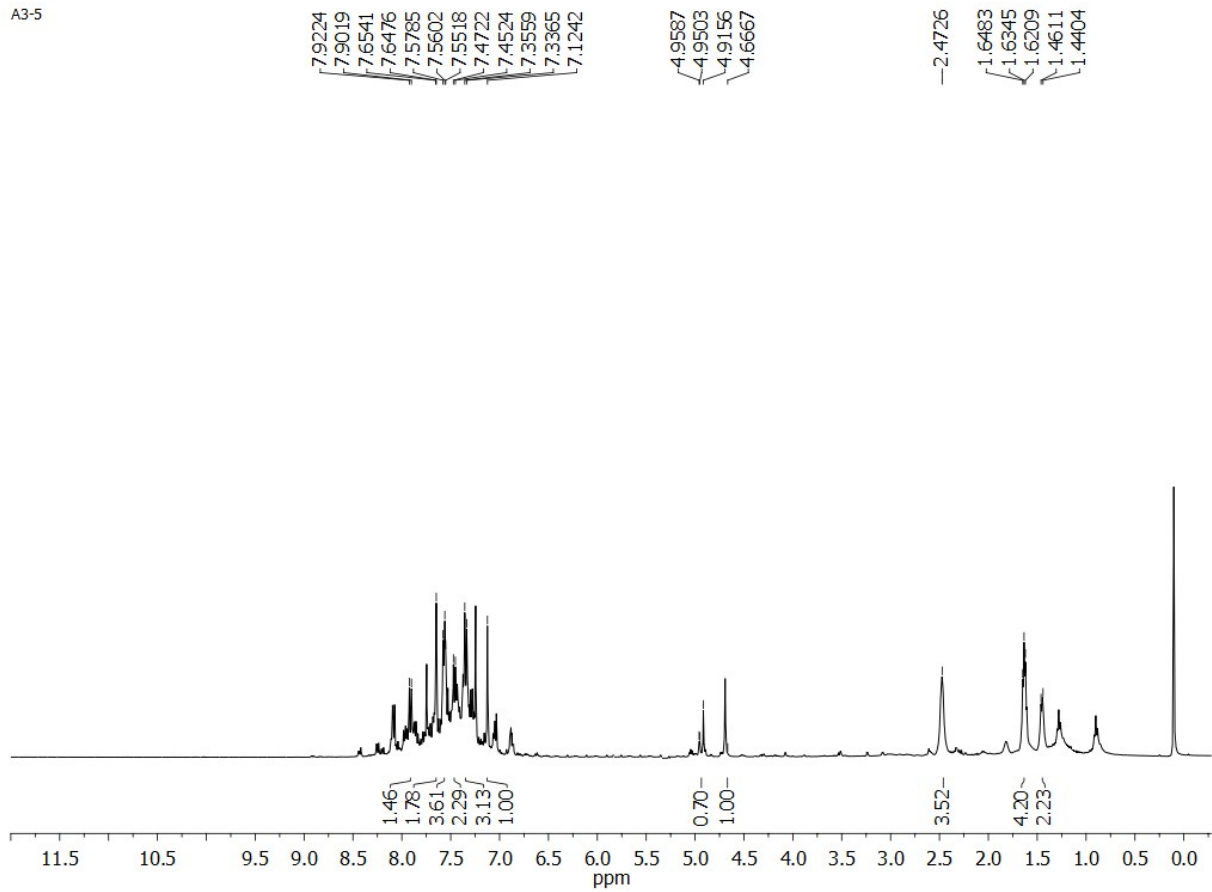

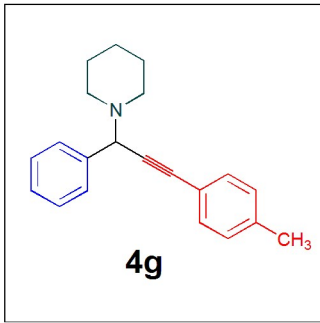

1-(1-phenyl-3-p-tolylprop-2-ynyl)piperidine.

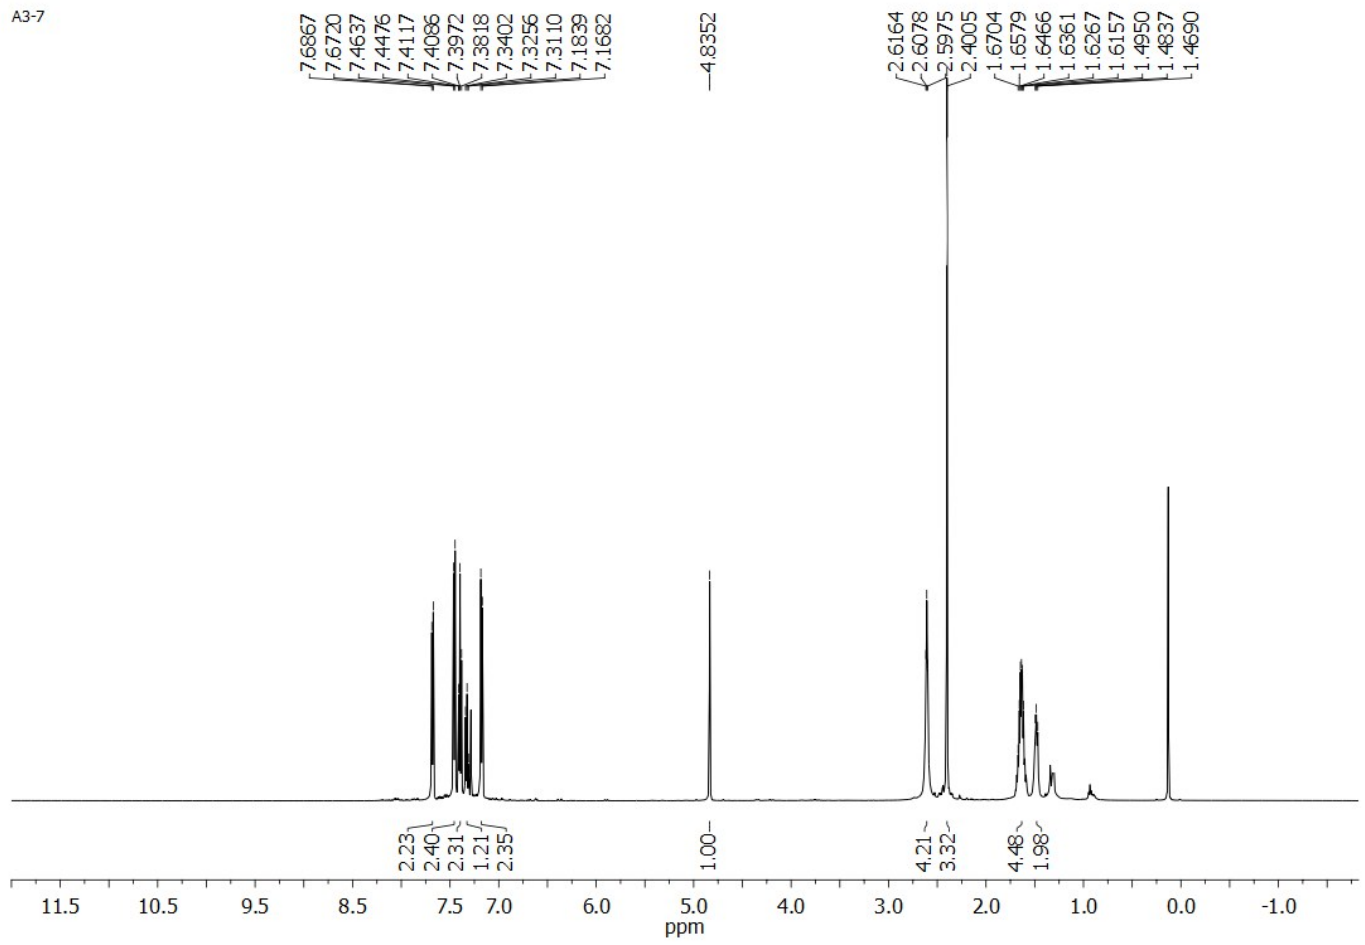

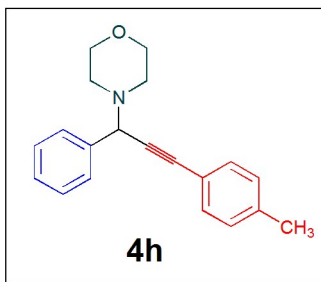

4-(1-phenyl-3-p-tolylprop-2-ynyl)morpholine.

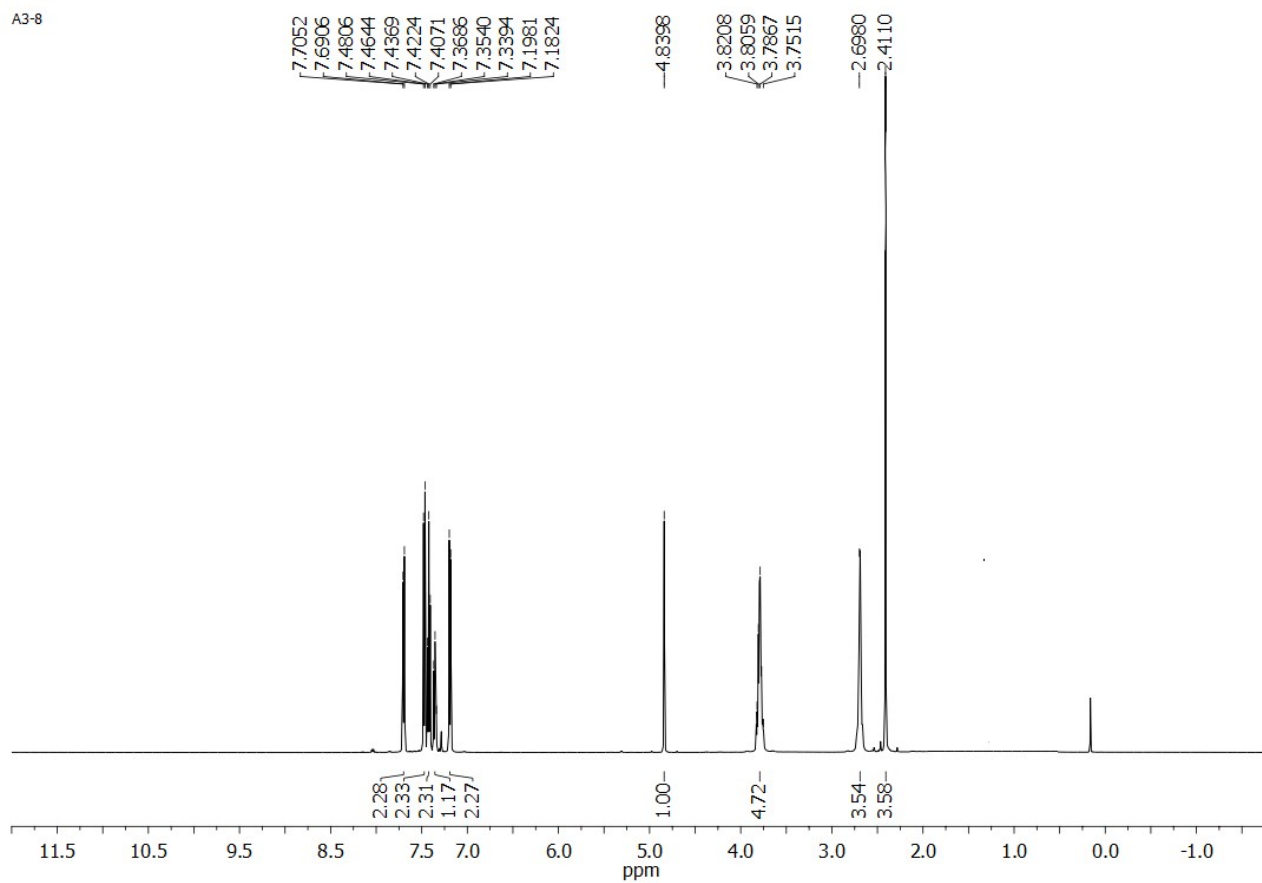

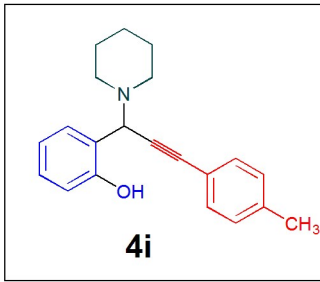

2-(1-(piperidin-1-yl)-3-p-tolylprop-2-ynyl)phenol.

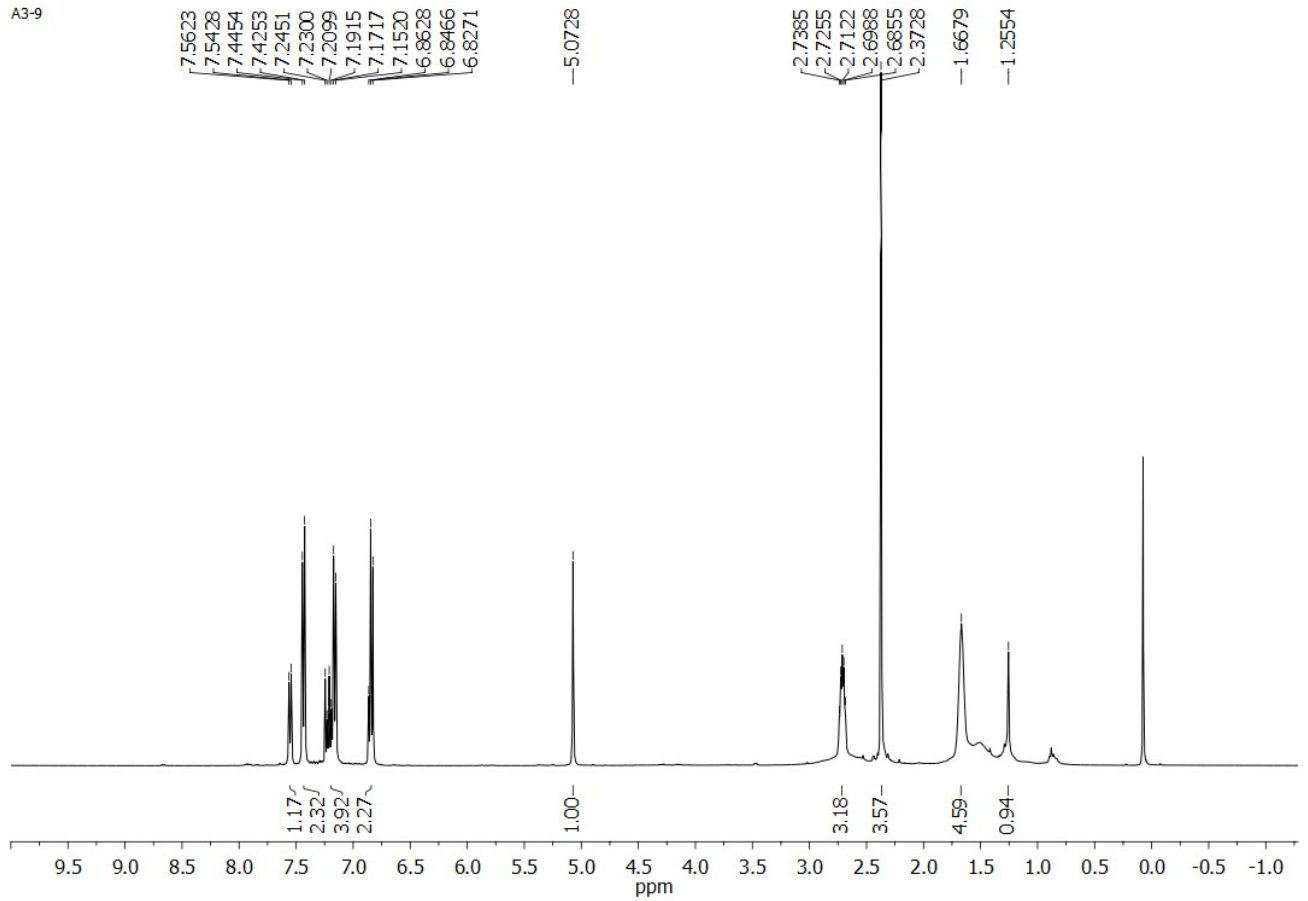

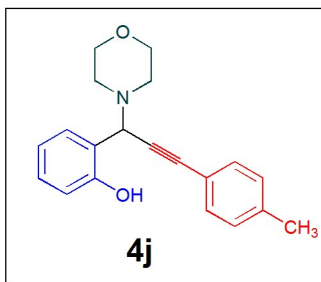

2-(1-morpholino-3-p-tolylprop-2-ynyl)phenol, Yellow oily liquid.

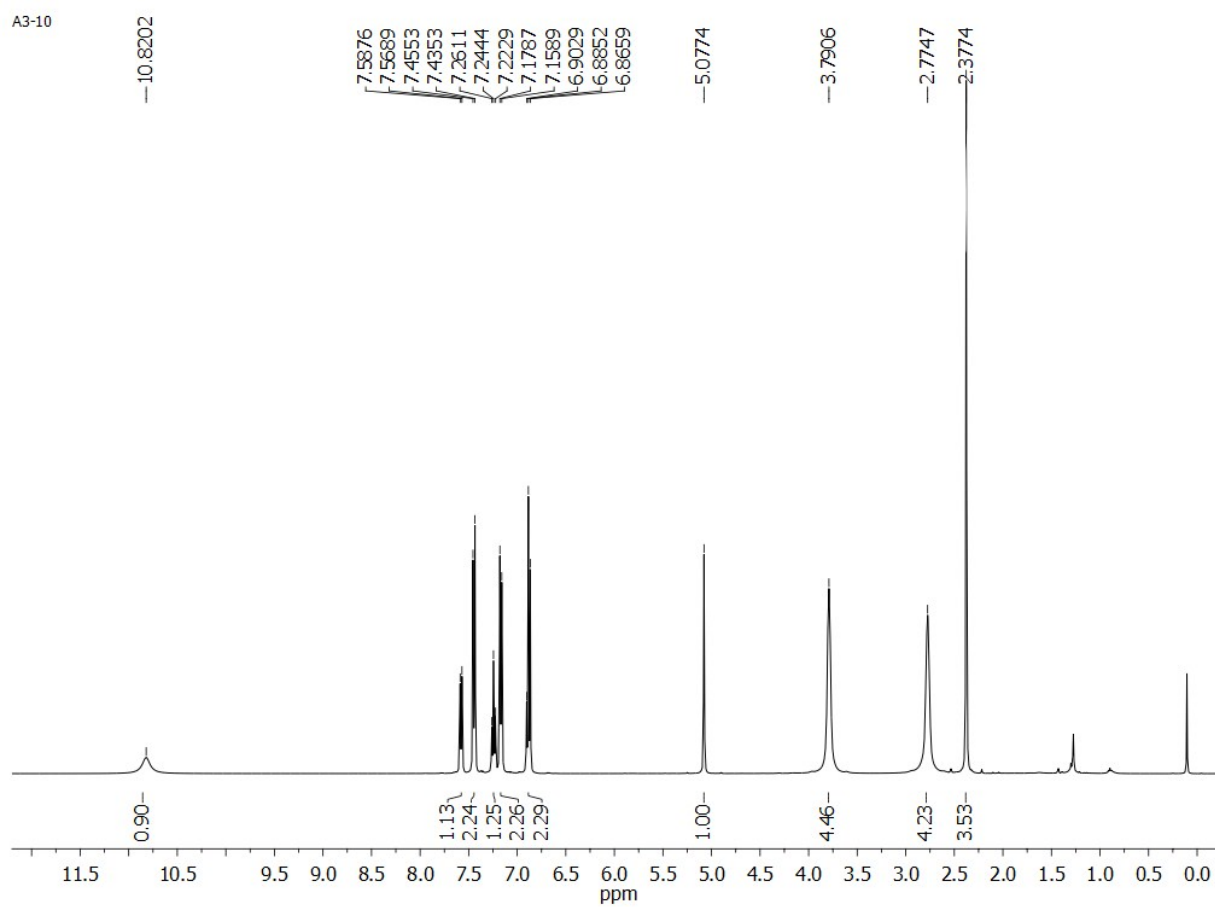



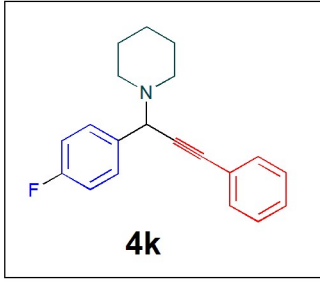

*1-(1-(4-fluorophenyl)-3-phenylprop-2-ynyl)piperidine.*

EX-ISMD-Sweta-FLU-RP-1500MHz  
 EX-ISMD-Sweta-FLU-RP-1500MHz  
 PROTONRO CDCl3 (ppm)

~4.7952  
 ~4.6970  
 ~4.1473

~2.5683  
 1.6648  
 1.6527  
 1.6394  
 1.6278  
 1.6159  
 1.6043

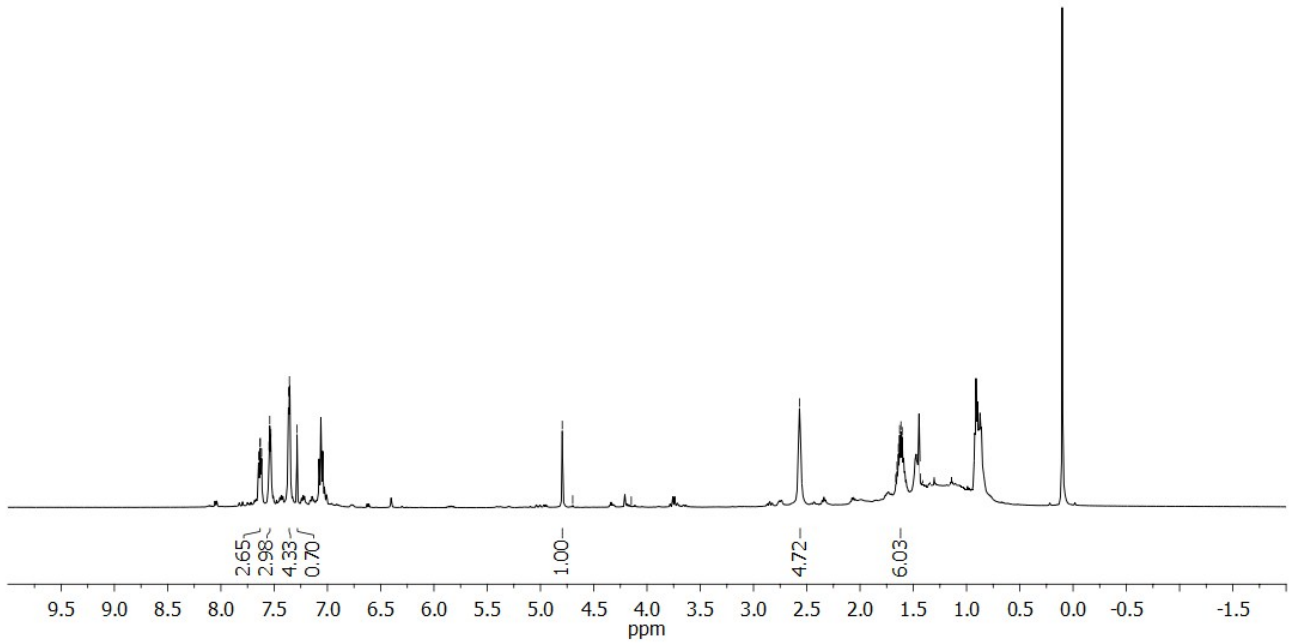

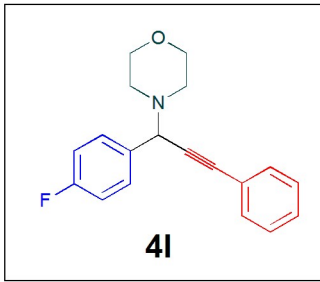

4-(1-(4-fluorophenyl)-3-phenylprop-2-ynyl)morpholine.

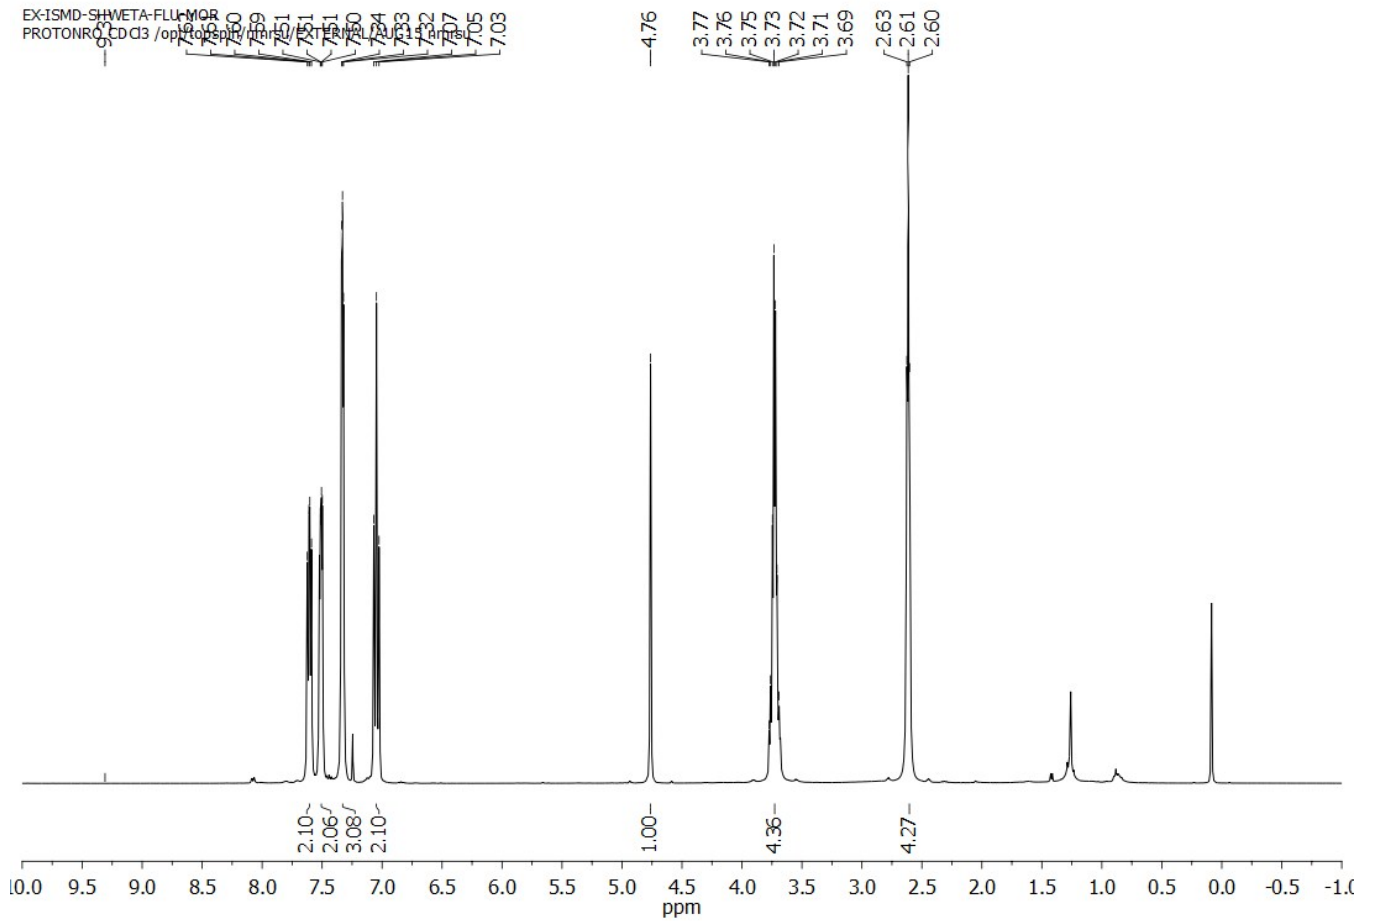

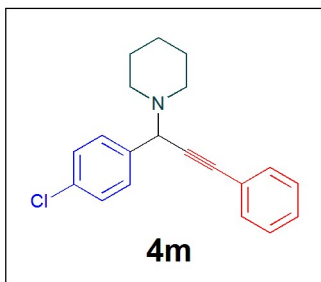

*1-(1-(4-chlorophenyl)-3-phenylprop-2-ynyl)piperidine.*

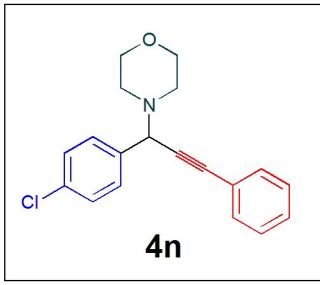

4-(1-(4-chlorophenyl)-3-phenylprop-2-ynyl)morpholine.

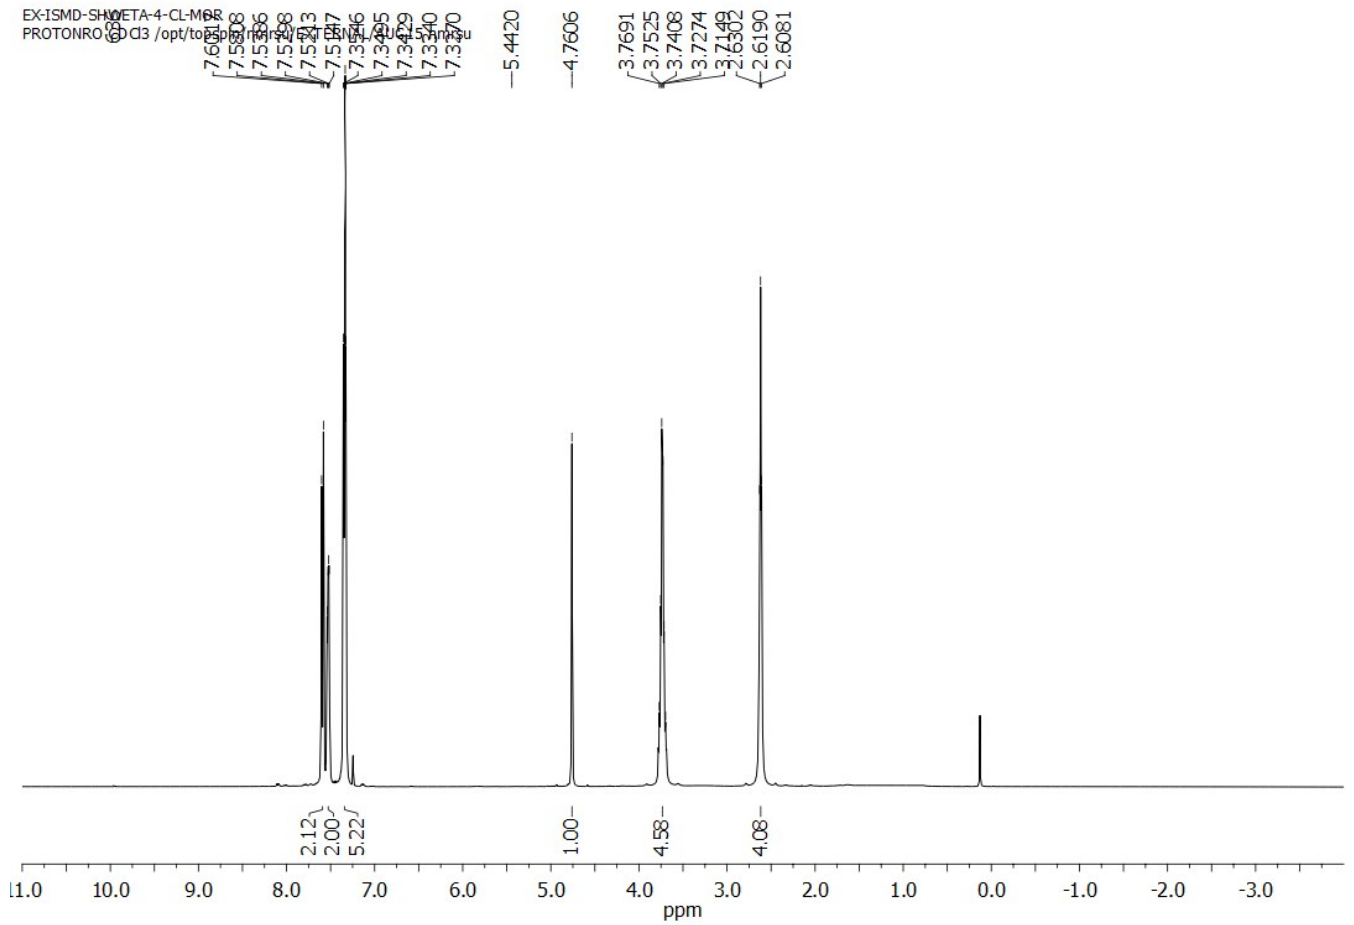

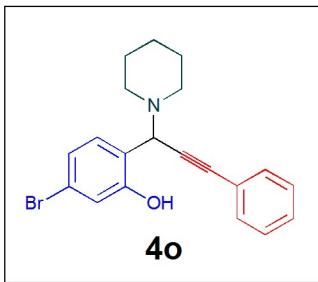

5-bromo-2-(3-phenyl-1-(piperidin-1-yl)prop-2-ynyl)phenol.

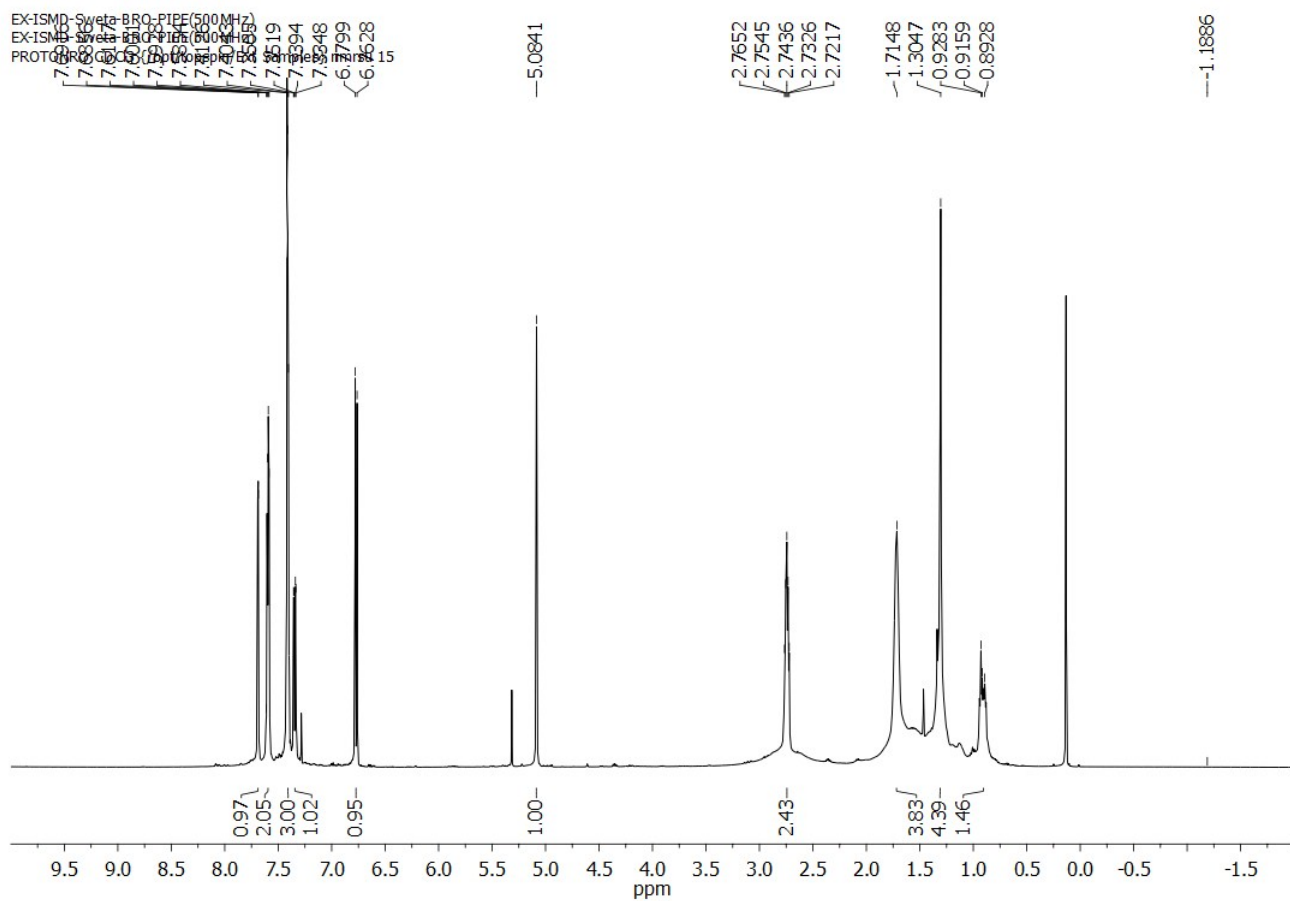

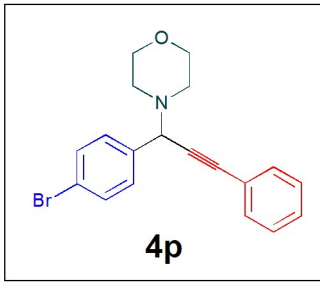

4-(1-(4-bromophenyl)-3-phenylprop-2-ynyl)morpholine.

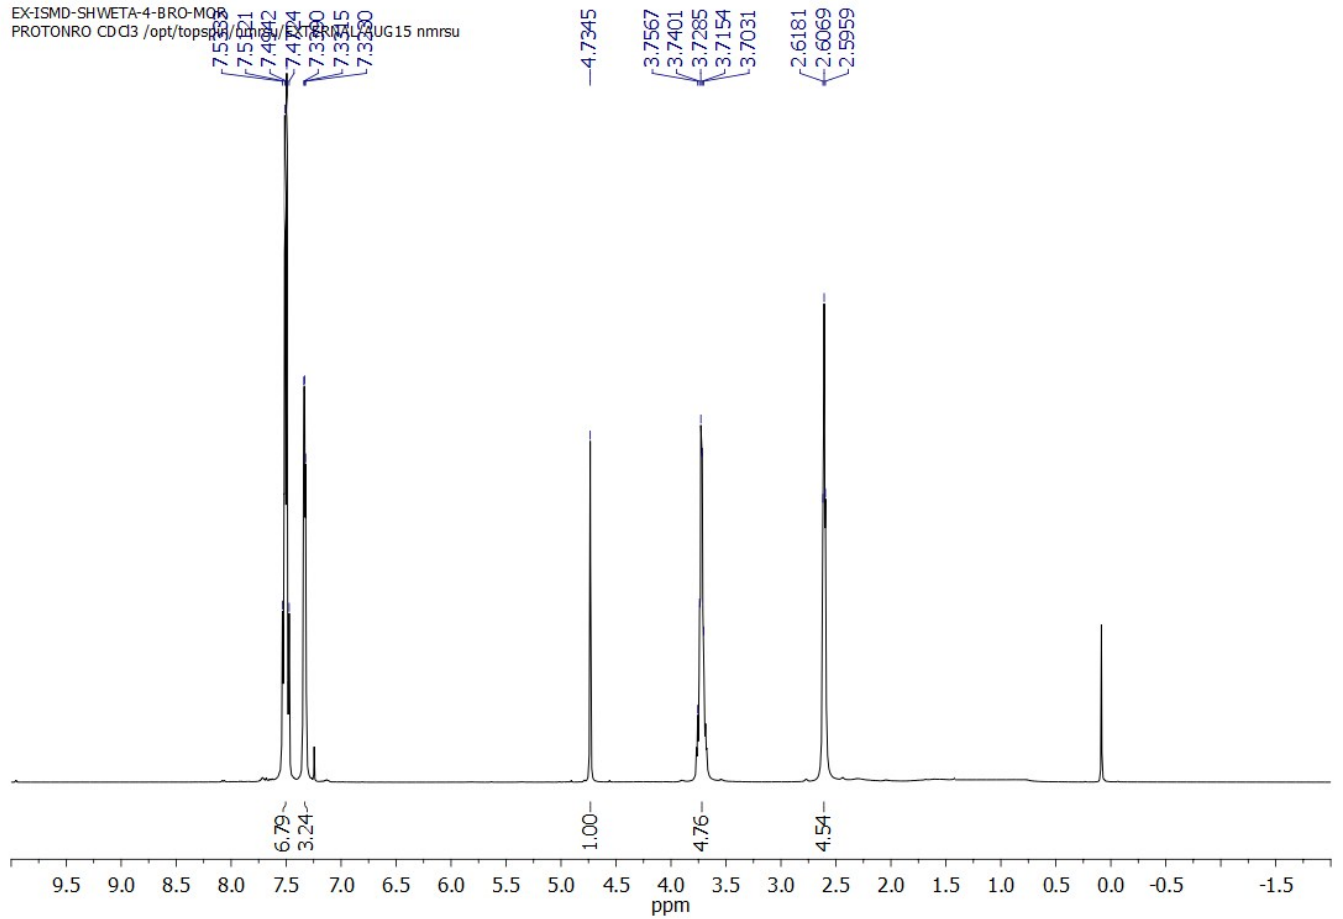

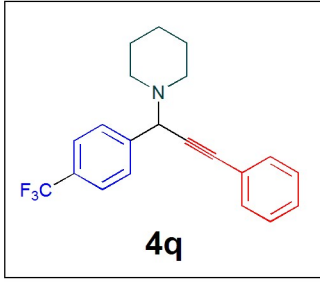

*1-(3-phenyl-1-(4-(trifluoromethyl)phenyl)prop-2-ynyl)piperidine.*

EX-1SMD-Sweta-A3-CF3-PIPE(500MHz)  
 EX-1SMD-Sweta-A3-CF3-PIPE(500MHz)  
 PROTONRO CDCl3 {/opt/topspin/Ext. Samples} nmr su 16

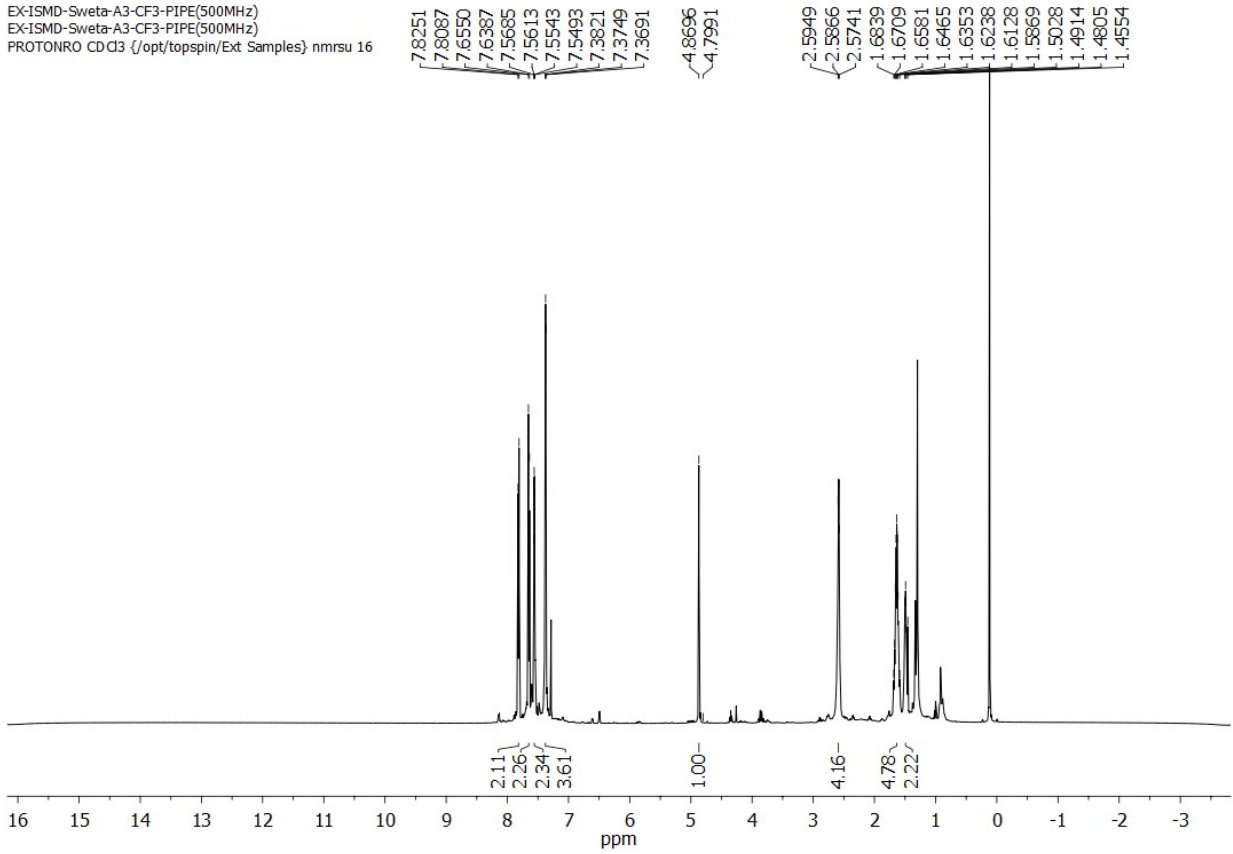

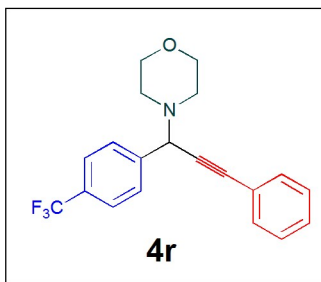

4-(3-phenyl-1-(4-(trifluoromethyl)phenyl)prop-2-ynyl)morpholine.

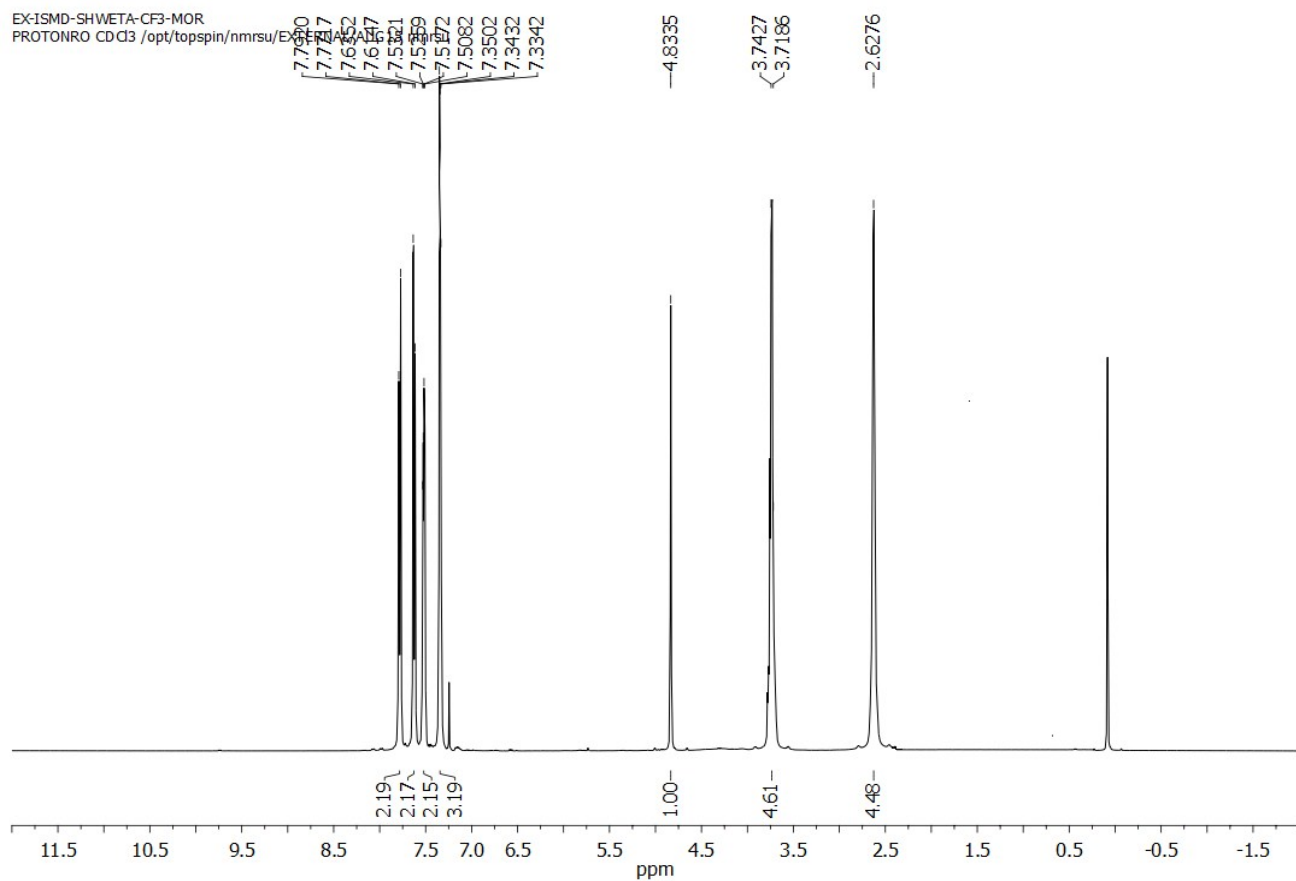



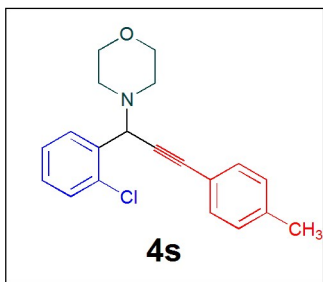

4-(1-(2-chlorophenyl)-3-p-tolylprop-2-ynyl)morpholine.

EX-ISMD-SHWETA-2-CL-MOR-PH-CH3  
 PROTONRO CDCl3 /opt/topspin/nmrstu/

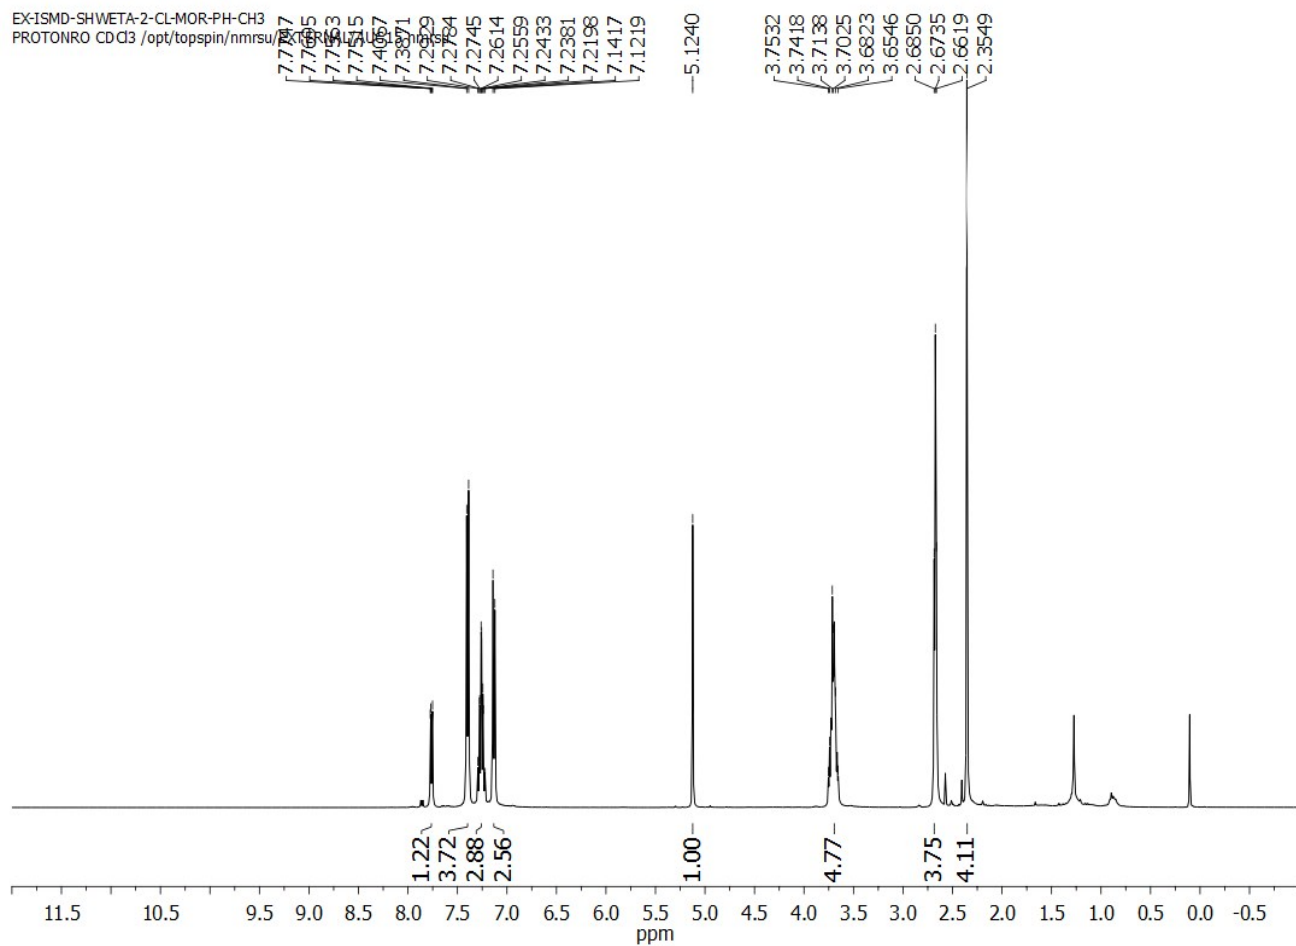

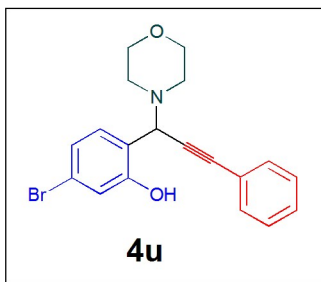

*5-bromo-2-(1-morpholino-3-phenylprop-2-ynyl)phenol.*

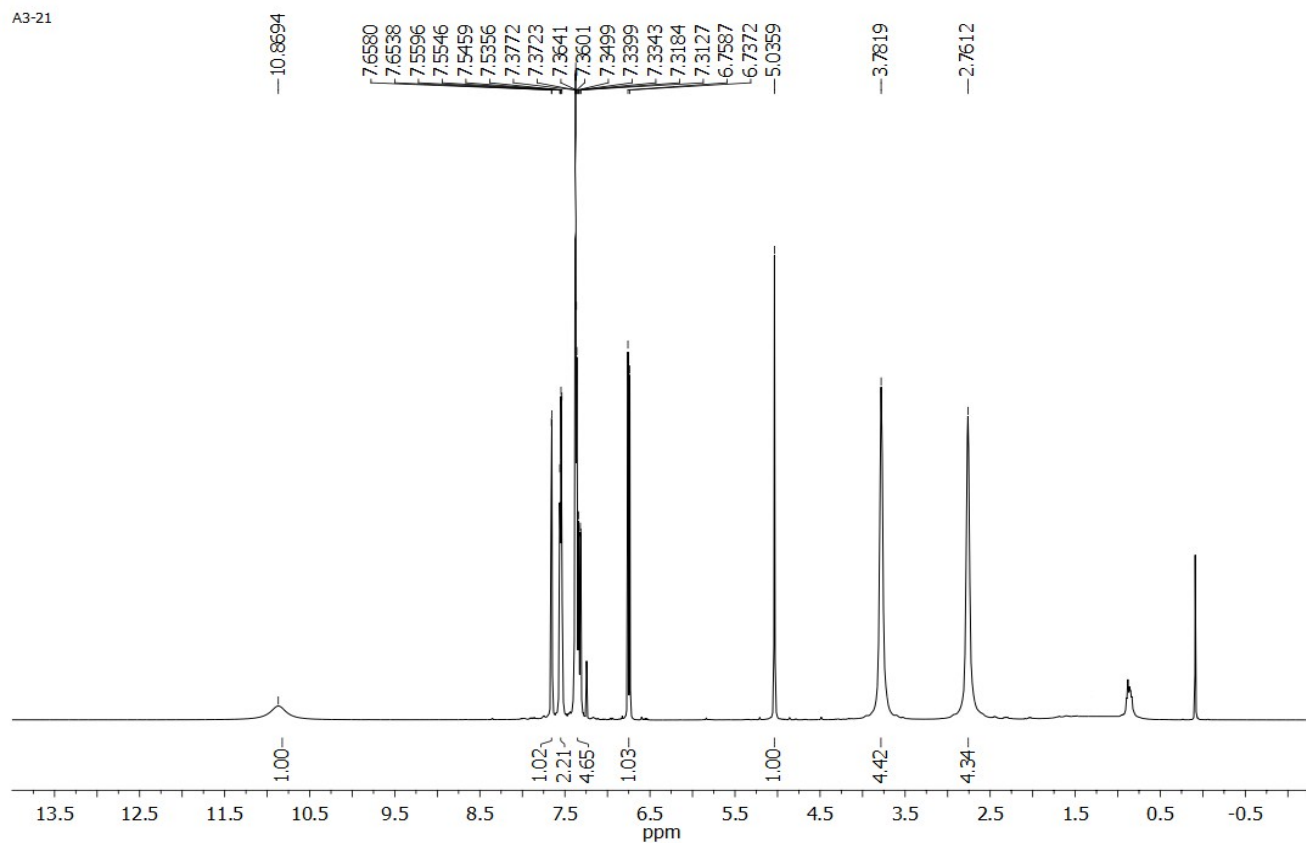

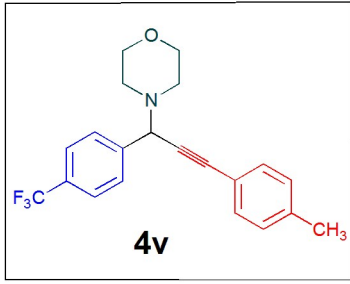

4-(3-p-tolyl-1-(4-(trifluoromethyl)phenyl)prop-2-ynyl)morpholine.

A3-22

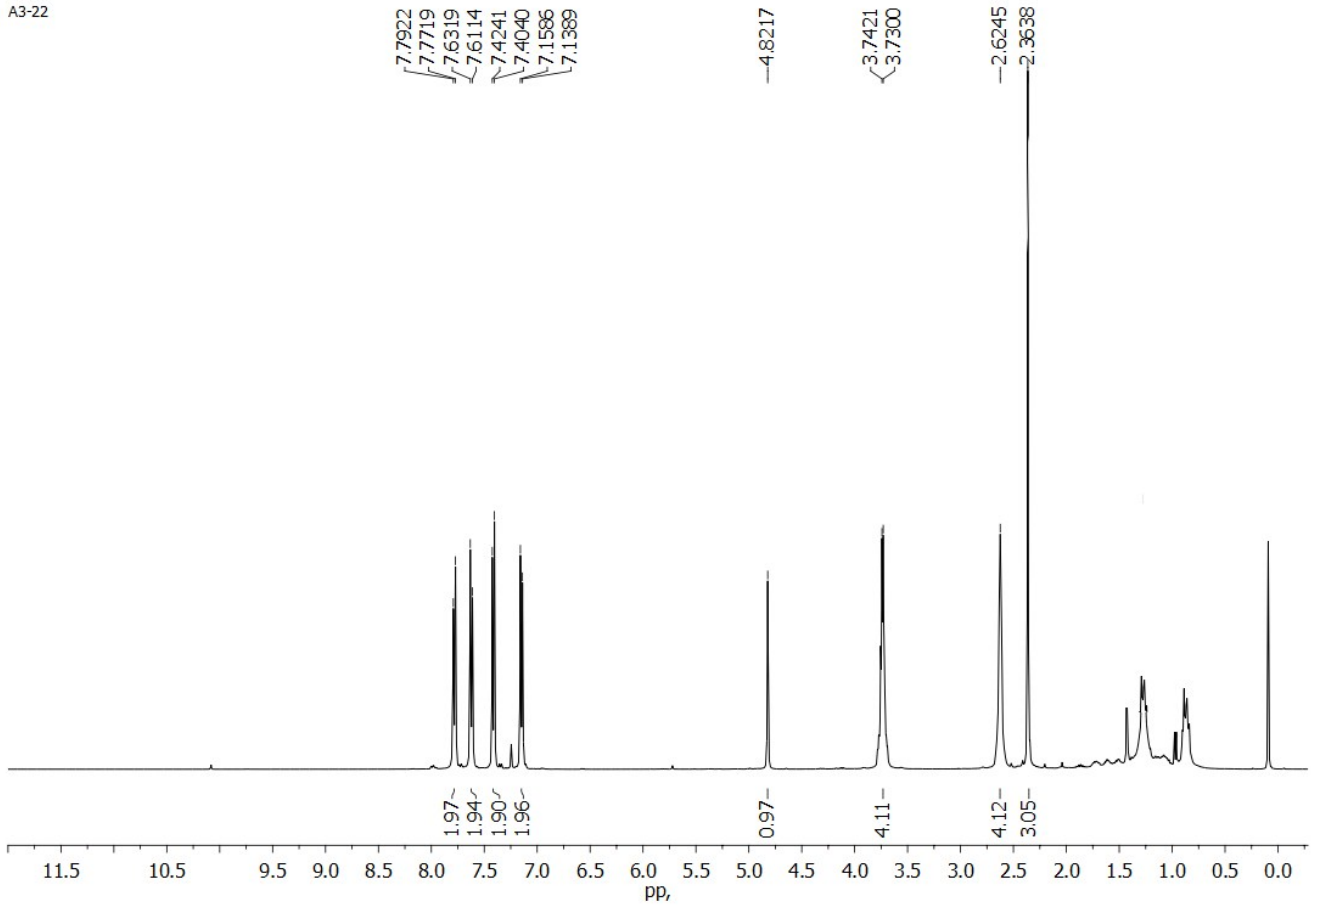

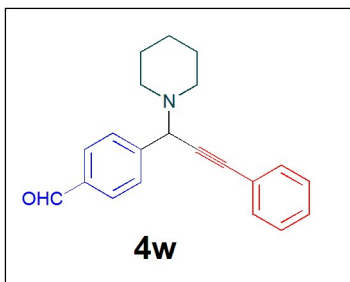

4-(3-phenyl-1-(piperidin-1-yl)prop-2-ynyl)benzaldehyde.

A3-23

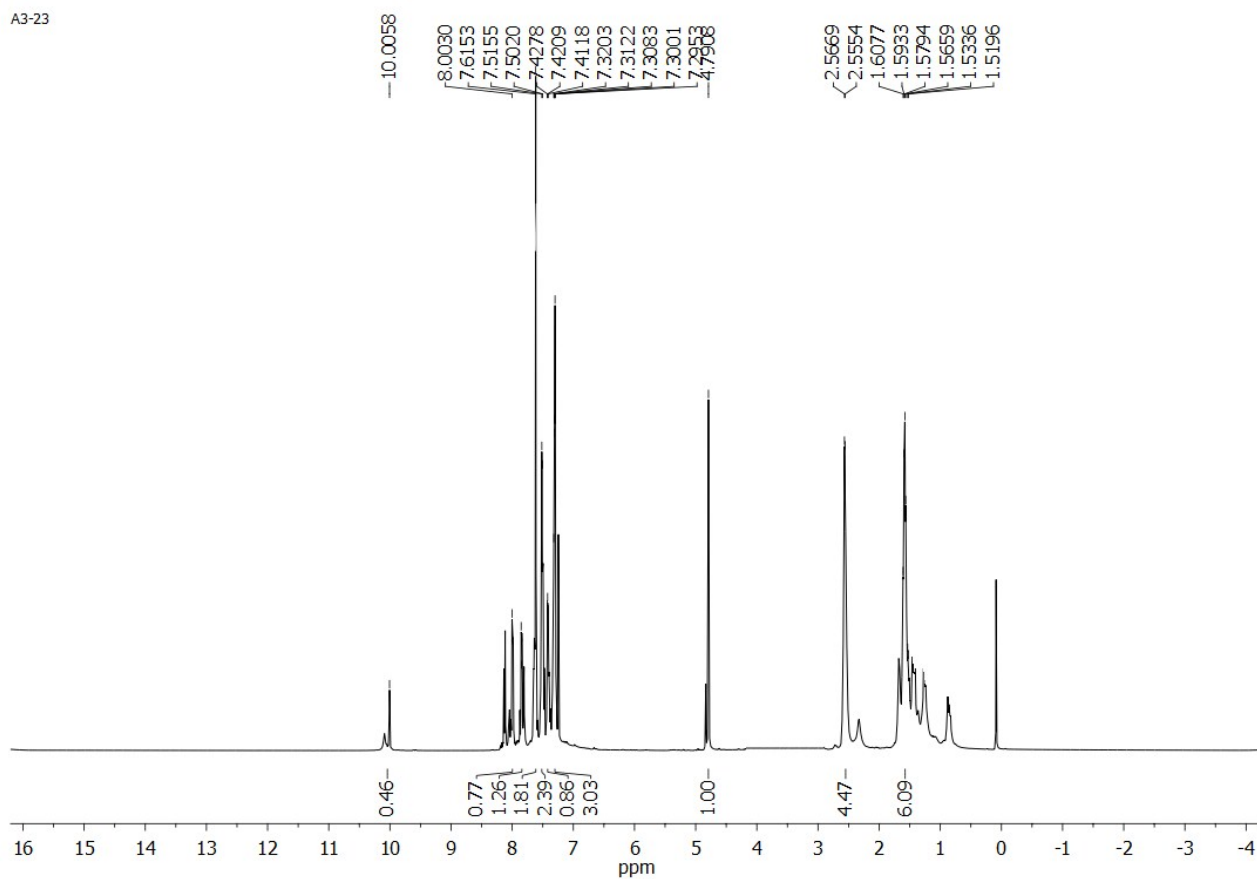

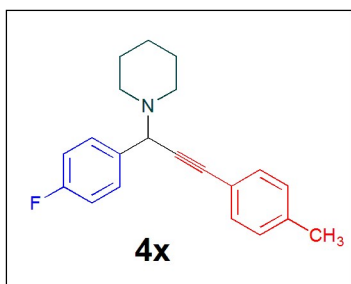

*1-(1-(4-fluorophenyl)-3-p-tolylprop-2-ynyl)piperidine.*

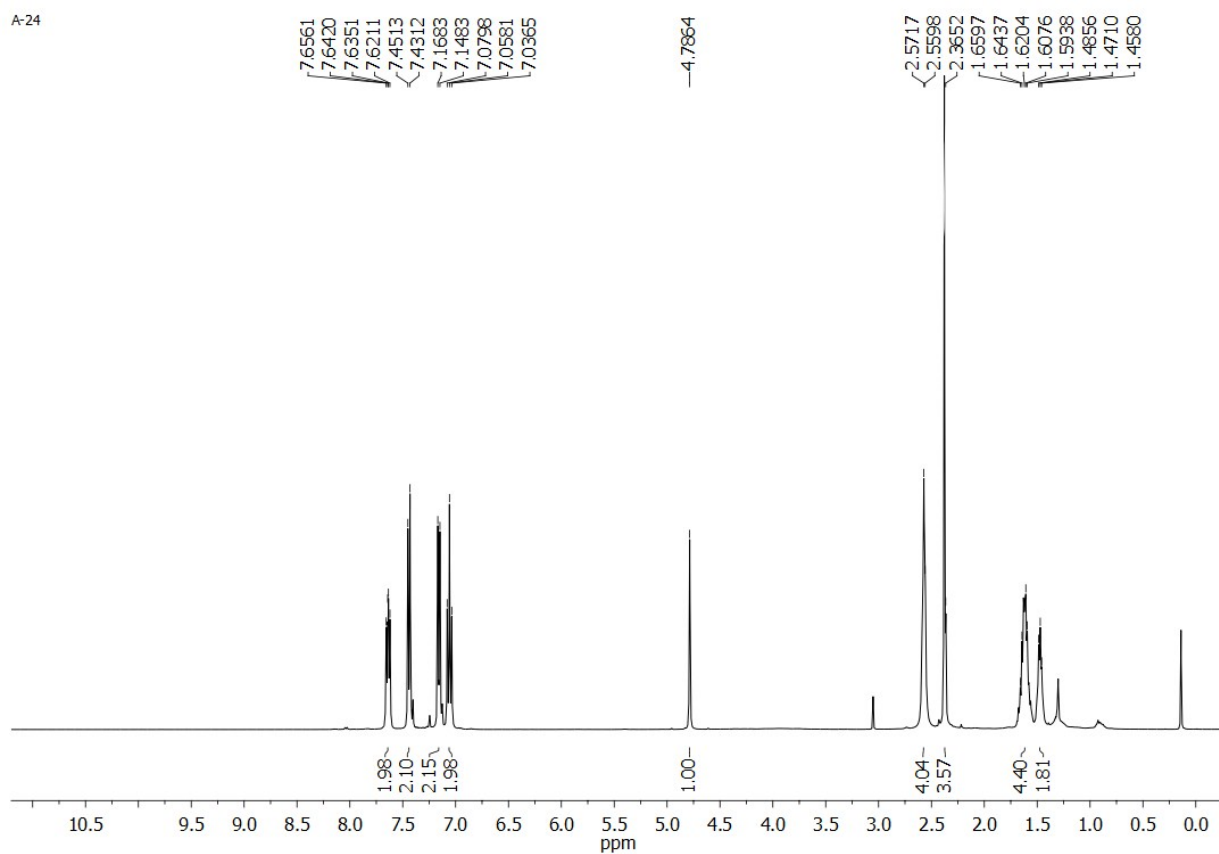

## References

1. M. Ozdemir, *Inorganica Chimica Acta*, 2014, **421**, 1–9.
2. N. I. Kovtyukhova, P. J. Ollivier, B. R. Martin, T. E. Mallouk, S. A. Chizhik, E. V. Buzaneva and A. D. Gorchinskiy, *Chem. Mater.*, 1999, 11, 771–778.
